# Supplementary material for: Complementary Sets of Autoantibodies Induced by SARS-CoV-2, Adenovirus and Bacterial Antigens Cross-React with Human Blood Protein Antigens in COVID-19 Coagulopathies
Source: MDPI journal article supplement (doi:10.3390/ijms231911500), 2022-09-29
Supplement: s1 [file s1]

# SUPPLEMENTARY MATERIAL

Table S1. Statistics related to Figure 2. Top value is the standard error, SE; bottom is the coefficient of determination,  $R^2$ , for the curve fit from which the inflection point was calculated to derive the  $K_D$ . No statistics could be calculated for experiments that did not yield a binding curve and these are left blank.

| SARS-CoV-2    | Serum Albumin | Cardio-lipin | $\beta$ 2GPI    | Platelet Factor 4 | Factor II       | Factor VIII     | Factor IX       | vWF             | PDE II          | Coll 1          |
|---------------|---------------|--------------|-----------------|-------------------|-----------------|-----------------|-----------------|-----------------|-----------------|-----------------|
| S1            |               |              |                 | 0.015<br>0.9540   |                 |                 |                 | 0.016<br>0.9893 | 0.032<br>0.9951 | 0.047<br>0.9968 |
| S2            |               |              |                 |                   |                 |                 |                 |                 |                 |                 |
| RBD           |               |              |                 |                   |                 |                 |                 |                 |                 |                 |
| Envelope      |               |              |                 |                   |                 |                 |                 |                 |                 | 0.038<br>0.9977 |
| Matrix        |               |              |                 | 0.009<br>0.9940   |                 |                 |                 |                 |                 | 0.035<br>0.9965 |
| Nucleoprotein |               |              |                 |                   | 0.039<br>0.9919 |                 | 0.047<br>0.9893 |                 |                 | 0.043<br>0.9964 |
| Other Viruses |               |              |                 |                   |                 |                 |                 |                 |                 |                 |
| Adenovirus    |               |              | 0.059<br>0.9829 | 0.010<br>0.9820   |                 |                 |                 | 0.012<br>0.9933 | 0.031<br>0.9614 |                 |
| Influenza A   |               |              |                 |                   |                 |                 |                 |                 |                 |                 |
| Coxsackie B   |               |              |                 |                   |                 |                 |                 |                 |                 |                 |
| HSV1          |               |              |                 |                   |                 | 0.013<br>0.9864 |                 |                 | 0.010<br>0.9820 | 0.067<br>0.7232 |

Table S2. Statistics related to Figure 6. Top value is the standard error, SE; bottom is the coefficient of determination,  $R^2$ , for the curve fit from which the inflection point was calculated to derive the  $K_D$ . No statistics could be calculated for experiments that did not yield a binding curve and these are left blank.

| Bacteria        | Serum Albumin | Cardio-lipin    | $\beta$ 2GPI    | Platelet Factor 4 | Factor II       | Factor VIII     | Factor IX | vWF             | PDE II          | Coll 1 |
|-----------------|---------------|-----------------|-----------------|-------------------|-----------------|-----------------|-----------|-----------------|-----------------|--------|
| Staphylococcus  |               | 0.038<br>0.9769 | 0.083<br>0.9324 | 0.008<br>0.9974   |                 |                 |           |                 | 0.011<br>0.9944 |        |
| GAS goat        |               | 0.028<br>0.9529 |                 | 0.009<br>0.9940   | 0.021<br>0.8405 | 0.053<br>0.9584 |           | 0.007<br>0.9965 | 0.012<br>0.9850 |        |
| GAS rabbit      |               |                 |                 |                   |                 | 0.285<br>0.7923 |           |                 |                 |        |
| Klebsiella      |               | 0.130<br>0.9749 | 0.046<br>0.9763 |                   |                 |                 |           |                 | 0.014<br>0.9368 |        |
| E. coli         |               | 0.019<br>0.9837 | 0.030<br>0.9479 | 0.003<br>0.9985   |                 |                 |           |                 | 0.009<br>0.9915 |        |
| Clostridium     |               |                 |                 | 0.023<br>0.6745   | 0.01<br>0.9915  |                 |           |                 |                 |        |
| M. tuberculosis |               |                 |                 | 0.004<br>0.9929   | 0.032<br>0.9911 |                 |           |                 |                 |        |

Table S3. Statistics related to Figure 11. Top value is the standard error, SE; bottom is the coefficient of determination,  $R^2$ , for the curve fit from which the inflection point was calculated to derive the  $K_D$ . No statistics could be calculated for experiments that did not yield a binding curve and these are left blank.

| SARS-CoV-2    | Strep Gt        | GAS RabHRP      | Staph Gt HRP    | Kleb Gt HRP    | E. coli Gt      | Clost HRP Rabbit | M. tb GP |
|---------------|-----------------|-----------------|-----------------|----------------|-----------------|------------------|----------|
| S1            | 0.010<br>0.9793 | 0.01<br>0.5883  | 0.002<br>0.9392 |                |                 |                  |          |
| S2            | 0.008<br>0.9925 | 0.014<br>0.8170 | 0.009<br>0.9944 | 0.04<br>0.8917 |                 |                  |          |
| RBD           | 0.015<br>0.9435 | 0.005<br>0.8515 |                 |                |                 |                  |          |
| Envelope      |                 |                 |                 |                |                 |                  |          |
| Matrix        |                 |                 |                 |                |                 |                  |          |
| Nucleocapsid  |                 |                 |                 |                |                 |                  |          |
|               |                 |                 |                 |                |                 |                  |          |
| Adenovirus Gt |                 |                 |                 |                |                 |                  |          |
| Influenza A   |                 |                 |                 |                |                 |                  |          |
| CVB blend     | 0.011<br>0.9889 |                 | 0.002<br>0.9392 |                | 0.016<br>0.9746 | 0.006<br>0.9748  |          |
| HSV1          |                 |                 | 0.017<br>0.9208 |                |                 |                  |          |
